# Supplementary material for: Immobilization of ssDNA on a metal–organic framework derived magnetic porous carbon (MPC) composite as a fluorescent sensing platform for the detection of arsenate ions
Source: Royal Society of Chemistry journal article supplement (doi:10.1039/c9an00139e), 2019-01-01
Supplement: c9an00139e1.pdf [file c9an00139e1.pdf]

The EDX data for MPC Composite before and after addition of arsenate and SEM mapping of MPC/As(V) displayed in Fig (S<sub>1</sub>,S<sub>2</sub>). From the fig.S<sub>1</sub>a shows that MPC composite contains Fe, O and C elements. Further addition of arsenate into to MPC composite, the MPC composite having higher affinity towards the arsenate ions. Which results, provide evidence for elements Fe, O, C and As(V) presence in MPC/As(V) and results was displayed in Fig.S<sub>1</sub>b. Further SEM-Elements mapping analysis of MPC/As (V) was done to confirmed the presence of C, O, Fe and As(V) shown in fig.S<sub>2</sub>.

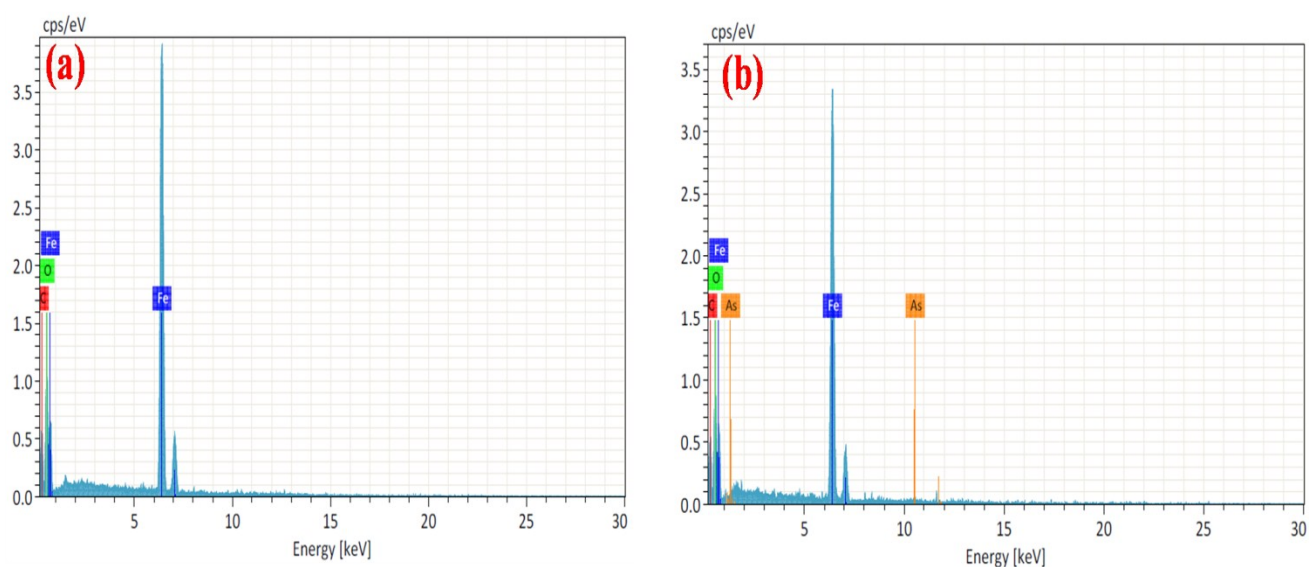

Fig.s<sub>1</sub>. EDX data of before and after addition of arsenate into the MPC Composite.

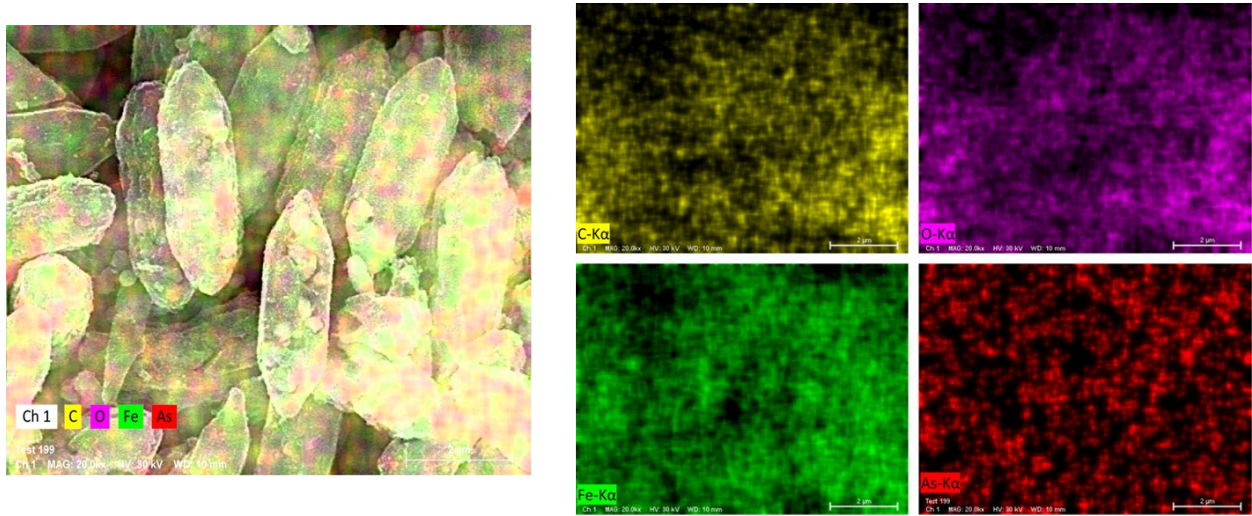

Fig.s<sub>2</sub>. The SEM mapping of each element present in MPC /As(V).
